# Supplementary material
Source: HighWire-hosted journal article supplement (https://bmjopen.bmj.com/content/12/8/e055521corr1)
Supplement: inline-supplementary-material-3 [file inline-supplementary-material-3.pdf]

**S9: CERQual Evidence Profile\_ Retention barriers**

| Summary of review finding                                                                                                                                                                                                                                                                                                                                                                                                                                                     | Studies contributing to the review finding. | Adequacy                                                                                     | coherence                                                                                                         | CERQual assessment of confidence in the evidence | Explanation of CERQual assessment                                                                                                     |
|-------------------------------------------------------------------------------------------------------------------------------------------------------------------------------------------------------------------------------------------------------------------------------------------------------------------------------------------------------------------------------------------------------------------------------------------------------------------------------|---------------------------------------------|----------------------------------------------------------------------------------------------|-------------------------------------------------------------------------------------------------------------------|--------------------------------------------------|---------------------------------------------------------------------------------------------------------------------------------------|
| <b>Changes planned before the full trial to address burden of follow-up questionnaires:</b><br><br>The need to complete and return questionnaires even if there are few symptoms was emphasized, modifying questionnaires to allow 'short-cutting' of irrelevant areas to reduce respondent burden, link questionnaire completion at follow-up to the face-to-face clinic review and the use of a variety of strategies, including telephone follow-up to maximise retention. | (34, 36, 46, 49, 50, 56-59)                 | Minor concerns about adequacy (only one study reported no changes to address these barriers) | Minor concerns about coherence (7 studies with well-grounded changes and one study with unclearly linked changes) | High confidence                                  | 9 studies with minor concerns about adequacy and coherence. No or very minor concerns about methodological limitations and relevance. |
